# Supplementary material
Source: PubMed Central journal article supplement (PMC395928)

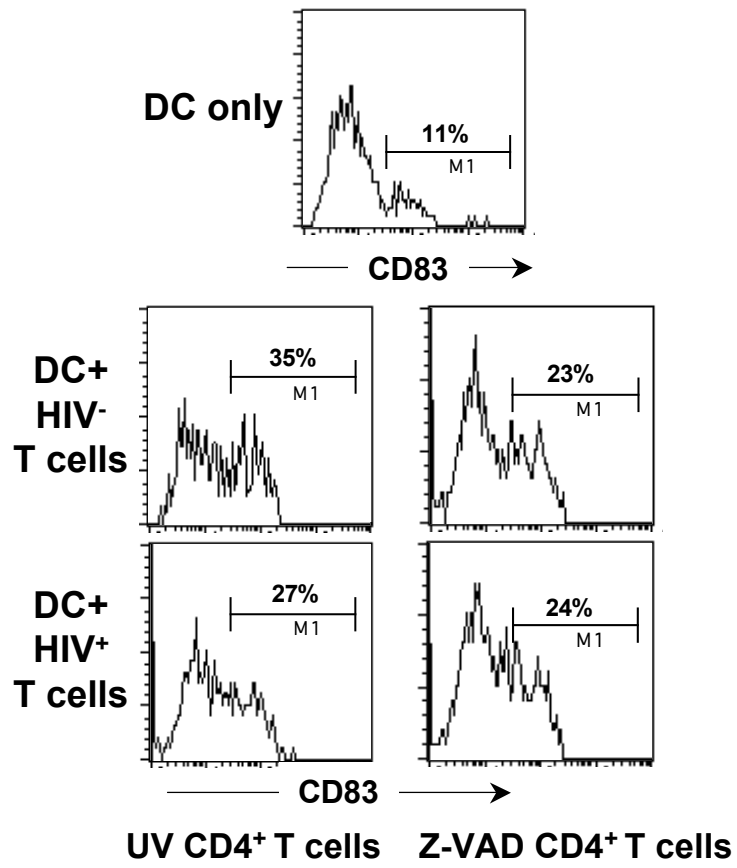

Supplement: pnas_101_16_6092__1.pdf [file pnas_101_16_6092__1.pdf]

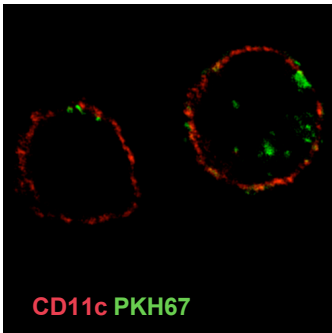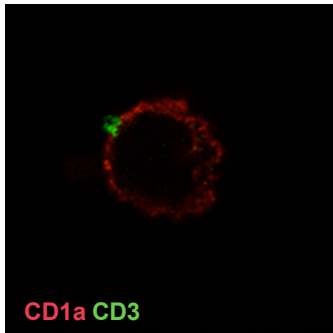

Supplement: pnas_101_16_6092__2.pdf [file pnas_101_16_6092__2.pdf]

**A**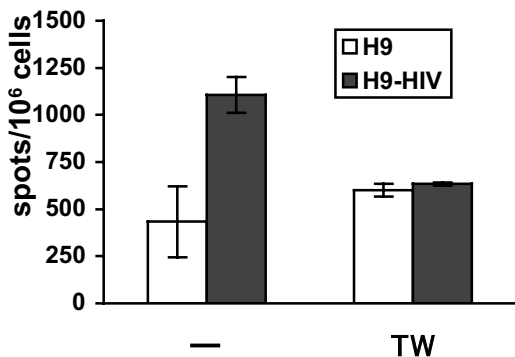**B**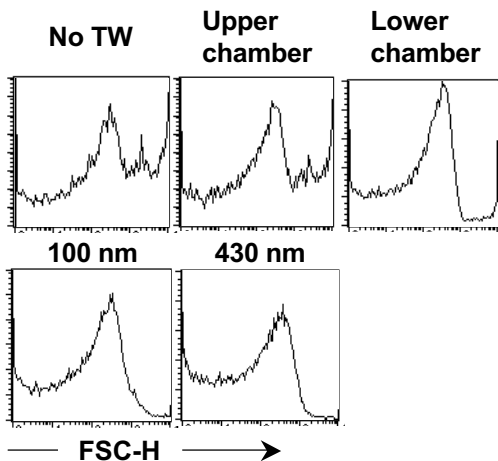

Supplement: pnas_101_16_6092__3.pdf [file pnas_101_16_6092__3.pdf]
